# Supplementary material for: Antibiotic stewardship in a tertiary care NICU of northern India: a quality improvement initiative
Source: PubMed Central journal article supplement — BMJ Open Qual. 2021 Aug 3;10(Suppl 1):e001470. doi: 10.1136/bmjoq-2021-001470 (PMC8336190; doi:10.1136/bmjoq-2021-001470), 2021-08-03
Supplement: bmjoq-2021-001470supp001.pdf [file bmjoq-2021-001470supp001.pdf]

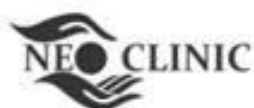

**Antibiotic Stewardship Programme-  
A QI Project for Judicious use of Antibiotics**

Patient Name-

Patient ID-

**Early Onset Sepsis**

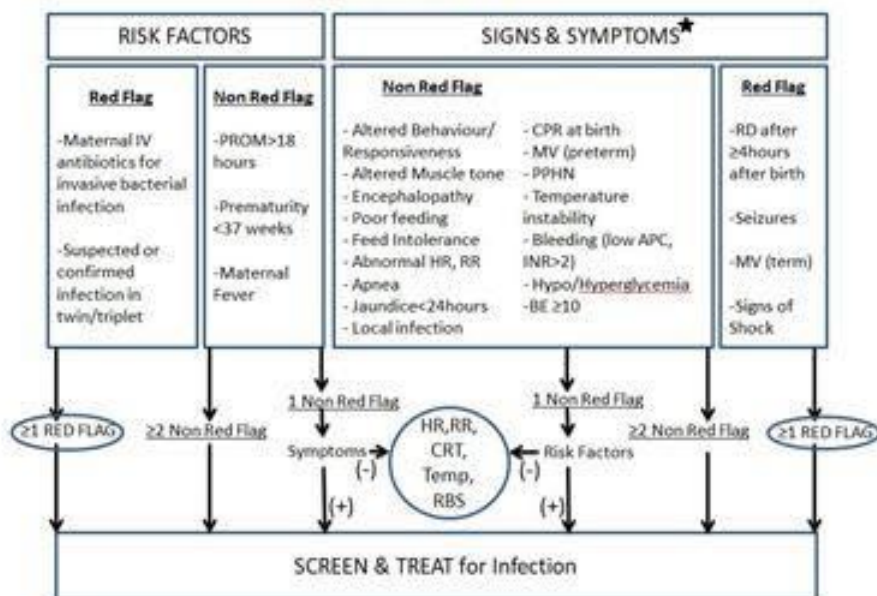

(\* Not Explained by RDS, Perinatal Asphyxia)

**Late Onset Sepsis**

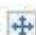

| Clinical Signs                                                          |                                                         | Laboratory Signs                                                                                        |
|-------------------------------------------------------------------------|---------------------------------------------------------|---------------------------------------------------------------------------------------------------------|
| -Core Temp > 38.5°C or < 36°C                                           | -Temperature Instability                                | -TLC < 4000/mm <sup>3</sup> or > 20000/mm <sup>3</sup>                                                  |
| - Bradycardia<br>- Tachycardia<br>- Rhythm Instability<br>- Hypotension | -Decreased U/O<br>-Mottled Skin<br>-Impaired Perfusion  | Hypoglycemia (< 45mg/dl)<br>Hyperglycemia (> 180mg/dl)<br>(Documented at least 2 times at standard GIR) |
| - Petechiae/ rash                                                       | - Sclerema                                              | Platelet count < 1,00,000/mm <sup>3</sup>                                                               |
| - Apnea<br>- Tachypnea                                                  | - ↑ O <sub>2</sub> requirement<br>- Respiratory Support | CRP > 15 mg/L                                                                                           |
| -Feed Intolerance<br>- Poor Sucking                                     | -Abdominal Distension                                   | Immature to total neutrophils I/T > 0.2                                                                 |
| - Irritability<br>- Lethargy                                            | - Hypotonia                                             | Metabolic acidosis. BE > 10<br>Lactates > 2                                                             |

\*Presence of at least 2 clinical symptoms and 2 laboratory signs in presence of suspected or proven infection.



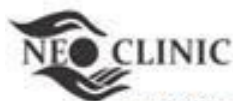

### SEPTIC WORKUP & ANTIBIOTIC PRESCRIPTION FORM

|                                                                                     | 1 <sup>st</sup> Episode      | 2 <sup>nd</sup> Episode      | 3 <sup>rd</sup> Episode      | 4 <sup>th</sup> Episode      |
|-------------------------------------------------------------------------------------|------------------------------|------------------------------|------------------------------|------------------------------|
| <b>Date</b>                                                                         |                              |                              |                              |                              |
| -Sepsis Screen 1<br>-Date:                                                          |                              |                              |                              |                              |
| -Sepsis Screen 2<br>-Date:                                                          |                              |                              |                              |                              |
| Blood Culture<br>-Date:                                                             |                              |                              |                              |                              |
| -CSF<br>-Date:                                                                      |                              |                              |                              |                              |
| <b>Basis of starting antibiotics</b>                                                |                              |                              |                              |                              |
| 1 <sup>st</sup> line antibiotics<br>Ini. Pipoz + Amikacin<br>Ini. Ciprox + Amikacin | Start:<br>Stop:<br>Duration: | Start:<br>Stop:<br>Duration: | Start:<br>Stop:<br>Duration: | Start:<br>Stop:<br>Duration: |
| <b>REASON FOR UPGRADE</b>                                                           |                              |                              |                              |                              |
| 2 <sup>nd</sup> Line antibiotics<br>Ini. Meropenem +<br>Amikacin                    | Start:<br>Stop:<br>Duration: | Start:<br>Stop:<br>Duration: | Start:<br>Stop:<br>Duration: | Start:<br>Stop:<br>Duration: |
| <b>REASON FOR UPGRADE</b>                                                           |                              |                              |                              |                              |
| 3 <sup>rd</sup> Line antibiotics<br>Ini. Colistin + Amikacin<br>± Vancomycin*       | Start:<br>Stop:<br>Duration: | Start:<br>Stop:<br>Duration: | Start:<br>Stop:<br>Duration: | Start:<br>Stop:<br>Duration: |
| <b>REASON FOR UPGRADE</b>                                                           |                              |                              |                              |                              |
| Antifungal<br>Ini. Fluconazole<br>Ini. Amphot B                                     | Start:<br>Stop:<br>Duration: | Start:<br>Stop:<br>Duration: | Start:<br>Stop:<br>Duration: | Start:<br>Stop:<br>Duration: |
| Duration                                                                            |                              |                              |                              |                              |
| Type of infection (*VAP,<br>CLABSI, others)                                         |                              |                              |                              |                              |

Total Duration of antibiotics:

Total Hospital Stay:

Please refer to the UNIT DRUG FORMULARY for standard dosage regimens
