# Supplementary material for: Antibiotic stewardship in a tertiary care NICU of northern India: a quality improvement initiative
Source: PubMed Central journal article supplement — BMJ Open Qual. 2021 Aug 3;10(Suppl 1):e001470. doi: 10.1136/bmjoq-2021-001470 (PMC8336190; doi:10.1136/bmjoq-2021-001470), 2021-08-03
Supplement: bmjoq-2021-001470supp004.pdf [file bmjoq-2021-001470supp004.pdf]

**Supplementary 3****Table 1: Comparison of baseline characteristics of newborns in Observation phase and Implementation /Sustainability phase**

| <b>Baseline characteristics</b>     | <b>Observation phase (290)<br/>N (%)</b> | <b>Implementation phase (PDSA) + sustainability phase (n=2002)<br/>N (%)</b> | <b>P value</b> |
|-------------------------------------|------------------------------------------|------------------------------------------------------------------------------|----------------|
| Male                                | 203 (68.9%)                              | 1461 (73.1%)                                                                 | 0.65           |
| Females                             | 87 (31.1%)                               | 540 (26.9%)                                                                  |                |
| Gestational age (weeks)(Mean ± S.D) | 33.1 ± 6.2                               | 34 ± 4.45                                                                    | 0.33           |
| <28 weeks                           | 3.6%                                     | 4.8%                                                                         |                |
| 28-31 6/7 weeks                     | 19.4.7%                                  | 7.7%                                                                         |                |
| 32-36 6/7 weeks                     | 31.5%                                    | 34.0%                                                                        |                |
| >37 weeks                           | 36.8%                                    | 53.3%                                                                        |                |
| Birth weight (grams) (Mean ± S.D)   | 1989 ± 662                               | 2017 ± 947                                                                   | 0.37           |
| <1000 grams                         | 4.2%                                     | 4.6%                                                                         |                |
| 1000-1499 grams                     | 13.6%                                    | 12.2%                                                                        |                |
| 1500-2499 grams                     | 32.6%                                    | 33.1%                                                                        |                |
| >2500 grams                         | 49.4%                                    | 50.1%                                                                        |                |
| Risk factors for sepsis*            | 54%                                      | 48.4%                                                                        | 0.54           |
| MOD: NVD                            | 41%)                                     | 39.7%                                                                        | 0.42           |
| LSCS                                | 58.9%                                    | 60.2%                                                                        |                |

Data expressed as %, Mean (±SD) wherever applicable. P <0.05 Significant

\* Risk factors: Chorioamnionitis, Leaking PV >18 hours, Maternal fever.

\* MOD: Mode of delivery, NVD: Normal vaginal delivery, LSCS: Lower segment Cesarean section

\*
